# Supplementary material for: Possible Repositioning of an Oral Anti-Osteoporotic Drug, Ipriflavone, for Treatment of Inflammatory Arthritis via Inhibitory Activity of KIAA1199, a Novel Potent Hyaluronidase
Source: MDPI journal article supplement (doi:10.3390/ijms23084089), 2022-04-07
Supplement: s1 [file s1]

# Possible repositioning of an oral anti-osteoporotic drug, Ipriflavone, for treatment of inflammatory arthritis via inhibitory activity of KIAA1199, a novel potent hyaluronidase.

Hiroshi Koike<sup>1</sup>, Yoshihiro Nishida<sup>2</sup>, Tamayuki Shinomura<sup>3</sup>, Bisei Ohkawara<sup>4</sup>, Kinji Ohno<sup>4</sup>, Lisheng Zhuo<sup>1</sup>, Koji Kimata<sup>5</sup>, Takahiro Ushida<sup>5</sup>, Shiro Imagama<sup>1</sup>

<sup>1</sup>Department of Orthopedic Surgery, Nagoya University Graduate School of Medicine, 65 Tsurumai, Showa, Nagoya, Aichi, 466-8550, Japan

<sup>2</sup>Department of Rehabilitation Medicine, Nagoya University Hospital, 65 Tsurumai, Showa, Nagoya, Aichi, 466-8550, Japan

<sup>3</sup>Department of Hard Tissue Engineering, Tokyo Medical and Dental University, Tokyo, 113-8510, Japan

<sup>4</sup>Division of Neurogenetics, Center for Neurological Diseases and Cancer, Nagoya University Graduate School of Medicine, 65 Tsurumai, Showa, Nagoya, Aichi, 466-8550, Japan

<sup>5</sup>Multidisciplinary Pain Center, Aichi Medical University, Nagakute, Aichi, 480-1195, Japan

\* Correspondence: Correspondence and reprint requests to Y. Nishida, Department of Rehabilitation Medicine, Nagoya University Hospital, 65 Tsurumai, Showa, Nagoya, Aichi, 466-8550, Japan  
Phone: 81-52-741-2111, Fax: 81-52-744-2260, E-mail: ynishida@med.nagoya-u.ac.jp

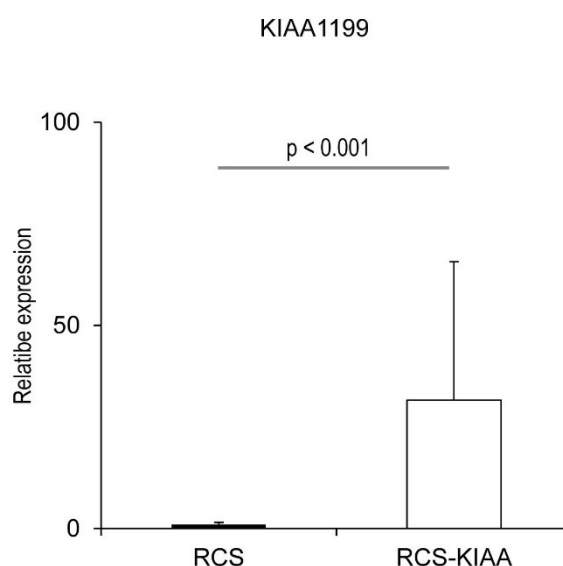

**Figure S1. Relative mRNA expression of KIAA1199 in RCS cells.** RCS-KIAA represents RCS cells, which are transfected with mouse KIAA1199 cDNA.

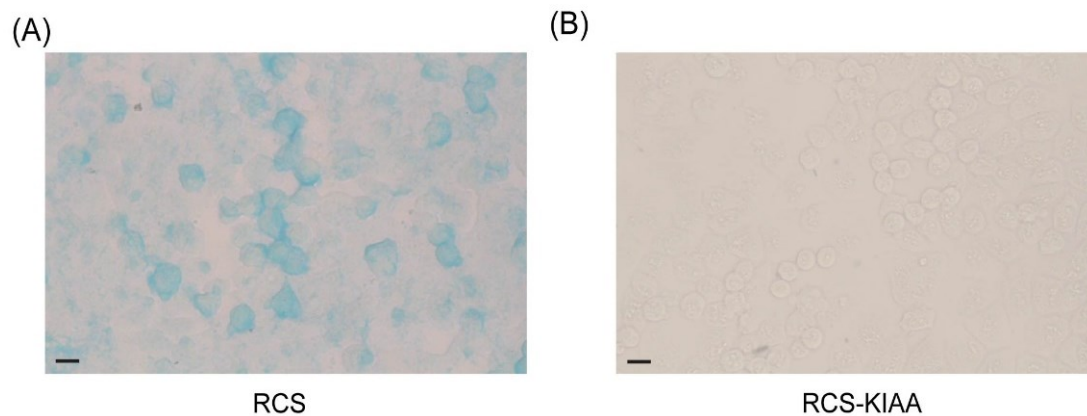

**Figure S2. Representative image of RCS with Alcian blue staining** RCS cells (A) and RCS-KIAA cells (B) were mono-cultured for 24 h and stained with Alcian blue. Bar = 20  $\mu$ m.

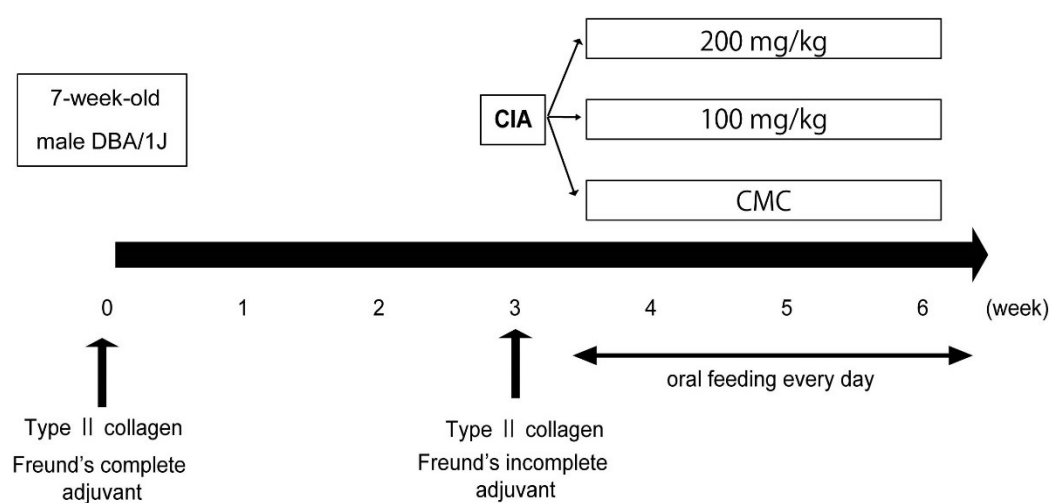

**Figure S3.** Schematic diagram of the experimental protocol for the CIA mouse model.
